# Supplementary material
Source: PubMed Central journal article supplement (PMC5867257)
Supplement: NIHMS937178-supplement-supplement_1.pdf [file NIHMS937178-supplement-supplement_1.pdf]

## Supporting Information

## Biomaterials-Based Approaches to Tumor Spheroid and Organoid Modeling

Pradip Shahi Thakuri, Chun Liu, Gary D. Luker, Hossein Tavana\*

**Table S1. A summary of natural and synthetic materials used for 3D tumor modeling as spheroids and organoids, types of cancer cells used in each study, and major conclusion of the studies are shown.**

| BIOMATERIAL                                          | 3D TUMOR MODEL                                                                                               | OUTCOMES                                                                                                                                                                                                                                                 | REFERENCE |
|------------------------------------------------------|--------------------------------------------------------------------------------------------------------------|----------------------------------------------------------------------------------------------------------------------------------------------------------------------------------------------------------------------------------------------------------|-----------|
| <b>Natural materials for tumor spheroid cultures</b> |                                                                                                              |                                                                                                                                                                                                                                                          |           |
| <b>Collagen</b>                                      | Mono-culture of breast cancer cells MDA-MB-231                                                               | Reduced spheroid invasion in stiffer matrices; paclitaxel resistance                                                                                                                                                                                     | 47        |
|                                                      | Co-culture of breast cancer cells MCF7 and mammary fibroblasts                                               | Formation of tight clusters with distinct border, apical-basal polarity, and lumen                                                                                                                                                                       | 49        |
|                                                      | Co-culture of colon cancer cells LS174T and cancer associated fibroblasts                                    | Co-culture promoted LS174T spheroid invasion in collagen matrix                                                                                                                                                                                          | 50        |
|                                                      | Co-culture of liver cancer cells HEPG2 and fibroblasts NIH 3T3                                               | Co-culture spheroids were highly resistant to doxorubicin compared to the mono-culture cancer cells spheroids                                                                                                                                            | 53        |
|                                                      | Mono-culture of colon cancer cells HT-29                                                                     | Upregulation of HIF-1 $\alpha$ and VEGF angiogenic factors                                                                                                                                                                                               | 51        |
|                                                      | Mono-culture of breast cancer cells MDA-MB-231                                                               | Upregulation of HIF-1 $\alpha$ and VEGF-A; delayed upregulation of both markers at lower cell density                                                                                                                                                    | 40        |
|                                                      | Mono-culture of ovarian cancer cells SK-OV-3                                                                 | Mimicked oxygen gradients by 3D spatial localization of cells in a six-layered scaffold                                                                                                                                                                  | 54        |
| <b>Laminin rich ECM (lrECM)</b>                      | Mono-culture of various prostate and breast cancer cells                                                     | Malignant sub-types displayed disorganized, proliferative and non-polar colonies and were distinguishable from non-malignant cells based on their morphology; Gene expression of malignant cancer with distinct morphology frequently clustered together | 56,57,58  |
|                                                      | Mono-culture of Lewis lung carcinoma LLC1                                                                    | Cytoskeleton arrangement without formation of stress fibers; LLC1 clusters had marked differences in metabolic, MAPK, cell adhesion, and immune response genes compared to the 2D culture of the cells                                                   | 60        |
|                                                      | Co-culture of prostate cancer cells PC-3 and bone stromal cells; Pre-formed breast cancer spheroids in lrECM | Increased $\alpha_6$ - and/or $\beta_1$ -integrin in the co-culture compared to the mono-culture of PC-3 cells; Blocking $\beta_1$ integrin inhibited the growth of the spheroids                                                                        | 70, 66    |
| <b>Alginate</b>                                      | Mono-culture spheroids of hepatocarcinoma cells                                                              | Preserved acini, apical morphogenesis, stem cell markers and $\beta$ -catenin signaling; Wnt/ $\beta$ -catenin signaling                                                                                                                                 | 71        |

|                                                        |                                                          |                                                                                                                                                                                                          |     |
|--------------------------------------------------------|----------------------------------------------------------|----------------------------------------------------------------------------------------------------------------------------------------------------------------------------------------------------------|-----|
|                                                        |                                                          | pathway activity promoted spheroid formation and maintaining cancer cells stemness; Cells in spheroid culture were highly tumorigenic in mouse compared to cells cultured in 2D                          |     |
|                                                        | Mono-culture of oral cancer cells                        | High level of pro-angiogenic maker IL-8 but moderate alteration of VEGF expression                                                                                                                       | 72  |
|                                                        | Mono-culture of hepatocarcinoma cells                    | Actin reorganization to facilitate spheroid formation; Cell in spheroids expressed tight junctions, canaliculi like structures, showed microvilli on their surfaces and were arranged in trabecular form | 73  |
|                                                        | Mono-culture of prostate cancer cells PC-3               | Enriched expression of stem cell maker genes NANOG, OCT4, CD44, and CD133                                                                                                                                | 74  |
| <b>Chitosan</b>                                        | Mono-culture of colon cancer and hepatocarcinoma cells   | Upregulated cancer stem cell genes (OCT4, NANOG, CD133, CD44), epithelial maker EpCAM, and non-canonical Wnt-STAT3 signaling in CD44 <sup>+</sup> hepatocellular carcinoma cells                         | 79  |
| <b>Chitosan-Alginate (CA)</b>                          | Mono-culture of Hepatocarcinoma cells                    | High expression of Glypican-3 in spheroids compared to 2D cultures; cells were more tumorigenic, formed large tumors, and expressed pro-angiogenic growth factor such as IL-8, bFGF and VEGF             | 83  |
|                                                        | Mono-culture of glioblastoma cells U-87 MG               | Increased in vivo angiogenic capability of CA pre-cultured cells                                                                                                                                         | 85  |
| <b>Hyaluronic acid (HA)</b>                            | Mono-culture of prostate patient derived cells           | Continued expression of androgen receptor in long term culture; resistance to docetaxel treatment                                                                                                        | 94  |
|                                                        | Mono-culture of prostate cancer cells LNCaP              | Higher mRNA level of E-cadherin, and integrins $\alpha_5$ and $\beta_1$                                                                                                                                  | 95  |
|                                                        | Mono-culture of prostate cancer cells LNCaP              | Spheroids showed cortically organized F-actin, and increased protein and mRNA expression of pro-angiogenic factors VEGF <sub>165</sub> and IL-8                                                          | 98  |
| <b>Chitosan-hyaluronan (CH)</b>                        | Mono-cultures of A549 and H1299 small cell lung cancers  | Strong upregulation of N-cadherin, vimentin, fibronectin, anti-apoptotic genes BCRC5 and BCL2, EMT-related transcription factor TWIST1, and cancer stem cell genes CD44, CD133, SOX2, NANOG, POU5F1      | 99  |
| <b>Silk</b>                                            | Osteosarcoma                                             | Level of Cyclin B, E2F1, Ki67, and PcNA were similar to those in a SCID mouse model                                                                                                                      | 104 |
|                                                        | Breast cancer MDA-MB-231 cells                           | Spheroids displayed proliferation gradients of cells and growth that followed Gompertz law; Upregulated IL-8 and VEGF markers                                                                            | 105 |
| <b>Synthetic materials for tumor spheroid cultures</b> |                                                          |                                                                                                                                                                                                          |     |
| <b>RGD functionalized PEG hydrogels</b>                | Mono-cultures of ovarian cancer cells OV-MZ-6 and SKOV-3 | Proliferation dependent on integrin binding capacity; Significantly upregulated $\alpha_3$ , $\alpha_5$ , $\beta_1$ integrins and MMP-9 levels; resistance to paclitaxel                                 | 109 |

|                                         |                                                                                                                                       |                                                                                                                                                                                                                                                                                                                                                                                                                                         |          |
|-----------------------------------------|---------------------------------------------------------------------------------------------------------------------------------------|-----------------------------------------------------------------------------------------------------------------------------------------------------------------------------------------------------------------------------------------------------------------------------------------------------------------------------------------------------------------------------------------------------------------------------------------|----------|
| <b>PEG-fibrinogen</b>                   | Mono-cultures of breast cancer cells MCF-7, SK-BR-3, and MDA-MB-231; Mono-cultures of breast and prostate cancers                     | MCF-7, SK-BR-3 cells formed compact spheroids in large range of hydrogel stiffness; MDA-MB-231 cells showed elongated morphology in softer matrices but round spheroids at higher stiffness; Cells in PEG-fibrinogen microspheres showed loss of apico-basal polarity, cellular and nuclear atypia, increased disorganization, elevated nuclear cytoplasmic ratio and nuclear volume density, and reduced length of cell-cell junctions | 110, 111 |
| <b>Cysteine responsive PEG hydrogel</b> | Mono-culture of liver cancer cells HEPG2                                                                                              | Recovered HEPG2 spheroid secreted higher level of urea and albumin compared to the 2D culture of cells; Level of secreted albumin was similar to the physiologic level in the body                                                                                                                                                                                                                                                      | 113      |
| <b>HA-PEGDA, HA-SH/PEGDA</b>            | Layered co-culture of uterine with ESS1 endometrial stromal sarcoma cells or prostate cancer cell with HS27A bone marrow stroma cells | Prostate cancer spheroid preserved PSA and EGFR in the co-culture; Cells in uterine cancer spheroid expressed mucin1 and estrogen-induced gene 121 protein in the co-culture                                                                                                                                                                                                                                                            | 114      |
|                                         | PDX cells (MDA PCa 183 and MDA PCa118b)                                                                                               | Preserved epithelial phenotype of the native tumors; Resistance to docetaxel compared to the spheroid that were generated from bone metastatic prostate cancer cell line (C42B)                                                                                                                                                                                                                                                         | 94       |
| <b>PEG-DEX ATPS</b>                     | Mono-culture of breast cancer cells MDA-MB-157                                                                                        | Spheroids showed normal growth over time, secreted and deposited major ECM proteins such as collagen I, fibronectin, and laminin; showed proliferation gradients, size and density dependent hypoxia, expressed stem cell markers (CD24, CD133, NANOG) and displayed hypoxia mediated docorubicin resistance                                                                                                                            | 124      |
| <b>Polycaprolactone (PCL)</b>           | Mono-culture of TC-71 Ewing sarcoma cells                                                                                             | Spheroids preserved major marker such as CD99 <sup>+</sup> , keratin <sup>-</sup> and smooth muscle actin; Significantly upregulated phospho-IGF-1R                                                                                                                                                                                                                                                                                     | 127      |
| <b>PLGA</b>                             | Mono-culture of ovarian cancer cells HO1980                                                                                           | Expressed E-cadherin and proliferated in the microsphere                                                                                                                                                                                                                                                                                                                                                                                | 137      |
|                                         | Mono-culture of glioblastoma cells U-251                                                                                              | High expression of angiogenic factors, and resistance to doxorubicin; resistance to apoptosis (low caspase activity) by upregulating apoptosis-resistance proteins such as survivin and BCL-2                                                                                                                                                                                                                                           | 138      |
| <b>PLG</b>                              | Mono-culture of oral squamous cell carcinoma OSCC-3                                                                                   | 3D PLG pre-cultured OSCC-3 cells contained more blood vessels relative to the density of blood vessels in tumors formed by implanting 2D pre-cultured cells; tumors formed from 3D PLG pre-cultured spheroids expressed higher $\alpha_5$ -integrin receptors                                                                                                                                                                           | 141      |
| <b>Thermoresponsive hydrogels</b>       | Mono-culture of liver cancer cells HepG2                                                                                              | Enhanced albumin secretion and urea synthesis over a three-week culture period                                                                                                                                                                                                                                                                                                                                                          | 145      |

**Biomaterials for Tumor organoid cultures**

|                              |                     |                                                                                                                                                       |     |
|------------------------------|---------------------|-------------------------------------------------------------------------------------------------------------------------------------------------------|-----|
| <b>PEG-Matrigel hydrogel</b> | Mammary carcinoma   | Enhanced the stiffness of the Matrigel for 50 to 4000 Pa; Functionalizing PEG with adhesive peptides promoted migratory capacity of mammary carcinoma | 184 |
| <b>Recombinant matrix</b>    | Intestine organoids | Precisely controlled biochemical and biomechanical cues for intestinal organoids                                                                      | 185 |
